# Supplementary material for: Synthesis and structure–property relationships of SIS-g-PB copolymers and their application in hot-melt pressure-sensitive adhesives
Source: Royal Society of Chemistry journal article supplement (doi:10.1039/c7ra08180d), 2017-01-01
Supplement: c7ra08180d1.pdf [file c7ra08180d1.pdf]

## *Supplementary information*

### **Synthesis and structure-property relationships of SIS-g-PB copolymers and their application in hot-melt pressure-sensitive adhesives**

Zhongfu Zhao,<sup>a\*</sup> Peiying Liu,<sup>a</sup> Chunqing Zhang,<sup>a\*</sup> Wei Liu,<sup>a</sup> Yifu Ding,<sup>b</sup> Yandong Zhang,<sup>a</sup> Fanzhi Meng,<sup>a</sup> and Tao Tang<sup>c</sup>

<sup>a</sup>State Key Laboratory of Fine Chemicals, School of Chemical Engineering, Dalian University of Technology, No.2 Linggong Road, Dalian 116024, China

<sup>b</sup>Department of Mechanical Engineering, University of Colorado Boulder, Boulder, CO 80309-0427, USA

<sup>c</sup>State Key Laboratory of Polymer Physics and Chemistry, Changchun Institute of Applied Chemistry, Chinese Academy of Sciences, Changchun 130022, China

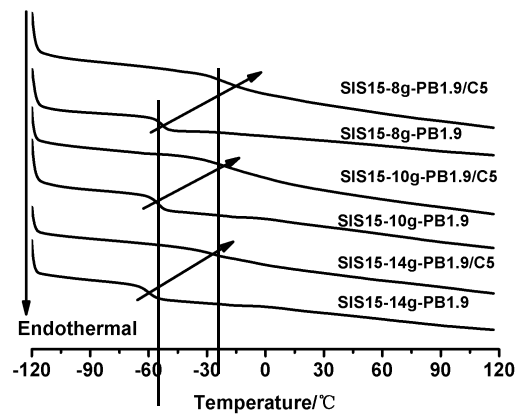

**Fig. S1** DSC curves of SIS15-8g-PB1.9, SIS15-10g-PB1.9, SIS15-14g-PB1.9, and their blends with C5 resin (1:1)

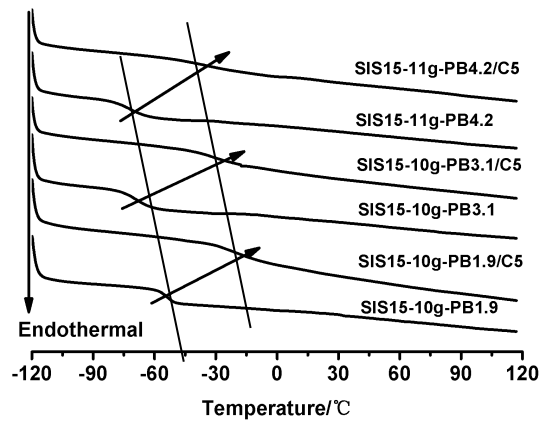

**Fig. S2** DSC curves of SIS15-10g-PB1.9, SIS15-10g-PB3.1, SIS15-11g-PB4.2, and their blends with C5 resin (1:1)
